# Supplementary material for: Multi-constituent co-assembling ordered mesoporous thiol-functionalized hybrid materials: synthesis and adsorption properties
Source: Royal Society of Chemistry journal article supplement (doi:10.1039/c000063a), 2010-01-01

## Supplementary Data

# Multi-constituent Co-assembling Ordered Mesoporous Thiol-functionalized Hybrid Materials: Synthesis and Adsorption Properties

**Xin Zhuang, Qingfei Zhao, Ying Wan\***

Department of Chemistry, Shanghai Normal University, Shanghai 200234, P. R.  
China;

\* To whom correspondence should be addressed. Tel: 86-21-6432-2516;

Fax: 86-21-6432-2511; E-mail: [ywan@shnu.edu.cn](mailto:ywan@shnu.edu.cn)

*Synthesis of low-polymerized phenolic resols:* The polymer precursors, low-molecular-weight, soluble phenolic resols, were prepared from phenol and formaldehyde in a base-catalyzed process.<sup>43</sup> In a typical procedure, 8.0 g of phenol was melted at 42 ~ 45 °C in a flask and mixed with 0.34 g of 20 wt% sodium hydroxide aqueous solution under stirring. After 10 min, 5.24 g of formalin was added. Then the mixture was heated to 70 °C. Upon further stirring for 1 h at this temperature, the mixture was cooled to room temperature. The pH value was adjusted with 2 M HCl solution until it reached a value of ~ 7.0. Subsequently, water was removed by vacuum evaporation below 45 °C. The water- and ethanol-soluble phenolic resols were then dissolved in ethanol (20 wt %) for further use.

*Characterization:* The small-angle X-ray diffraction (XRD) measurements were taken on a Rigaku D/max B diffractometer using Cu K $\alpha$  radiation (40 kV, 20 mA). The *d*-spacing values were calculated by the formula of  $d = 0.15408/2\sin\theta$ , and the unit cell parameters were calculated from the formula of  $a_0 = 2d_{10}/\sqrt{3}$ . N<sub>2</sub> adsorption-desorption isotherms were measured at 77 K with a Quantachrome NOVA 4000e analyzer. The Brunauer-Emmett-Teller (BET) method was utilized to calculate the specific surface areas ( $S_{\text{BET}}$ ). By using the Barrett-Joyner-Halenda (BJH) model, the pore volumes and pore size distributions were derived from the adsorption branches of isotherms. The micropore volumes ( $V_m$ ) were calculated from the *V*-*t* plot method. The *t* values were calculated as a function of the relative pressure using the de Boer equation,  $t \text{ (nm)} = [0.1399/(\log(p_0/p) + 0.0340)]^{1/2}$ .  $V_m$  was obtained using the equation of  $V_m \text{ (cm}^3\text{/g)} = 0.001547I$ , where *I* represents the *Y* intercept in the *V*-*t* plot.

Transmission electron microscopy (TEM) experiments were conducted on a JEOL 2011 microscope operated at 200 kV. The samples for TEM measurements were suspended in ethanol and supported onto a holey carbon film on a Cu grid. Weight losses and the associated temperature were determined by thermogravimetry analysis with a Mettler Toledo TG/SDTA 851e apparatus. Samples were heated from room temperature to 1000 °C at a rate of 10 °C/min in air flow. <sup>29</sup>Si solid state nuclear magnetic resonance (NMR) experiments were performed on a Bruker DSX300 spectrometer (Germany) under condition of magic angle sample spinning (MAS). <sup>29</sup>Si solid state MAS NMR spectra were collected at room temperature with a frequency of 59.6 MHz, a recycling delay of 600 s, a radiation frequency intensity of 62.5 kHz, and a reference sample of Q<sub>8</sub>M<sub>8</sub> ( $[(\text{CH}_3)_3\text{SiO}]_8\text{Si}_8\text{O}_{12}$ ). Energy dispersive X-ray spectroscopy (EDX) was performed on a Philips EDAX instrument. The S content was measured on a Vario EL III elemental analyzer (Germany). X-ray photoelectron spectroscopy (XPS) measurements were performed on a Perkin- Elmer PHI 5000CESCA system with a base pressure of 10<sup>-9</sup> Torr.

Fig. S1. TG curves for extracted SH-PS0.5-3.36, which are carried out in air from room temperature to 1000 °C.

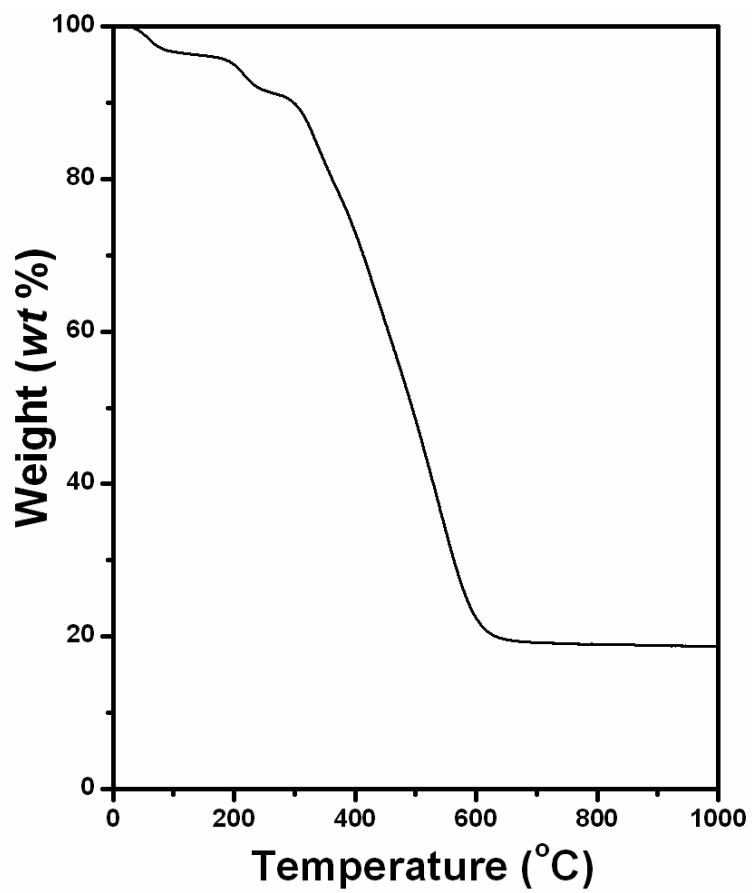

Fig. S2. XRD patterns for SH-PS(1) synthesized from co-assembly of triblock copolymer F127, phenolic resols, MPTMS after sulfuric acid extraction.

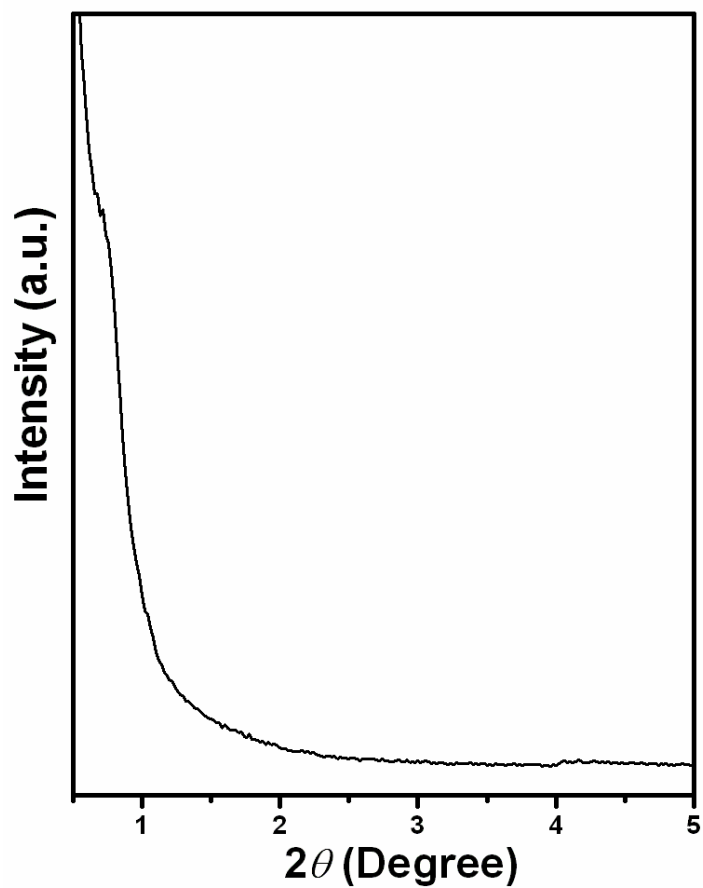

Fig. S3. TG curves for SH-PS $n$ - $x$  synthesized from co-assembly of triblock copolymer F127, phenolic resols, MPTMS and TEOS with a total silicon amount/quality of phenolic resols of (a) 10 mmol : 1.0 g and (b) 10 mmol : 0.16 g, and different MPTMS/TEOS ratios. PS1 and PS2 were synthesized from phenolic resols, and TEOS with a total silicon amount/quality of phenolic resols of 10 mmol : 1.0 g and 10 mmol : 0.16 g, respectively.

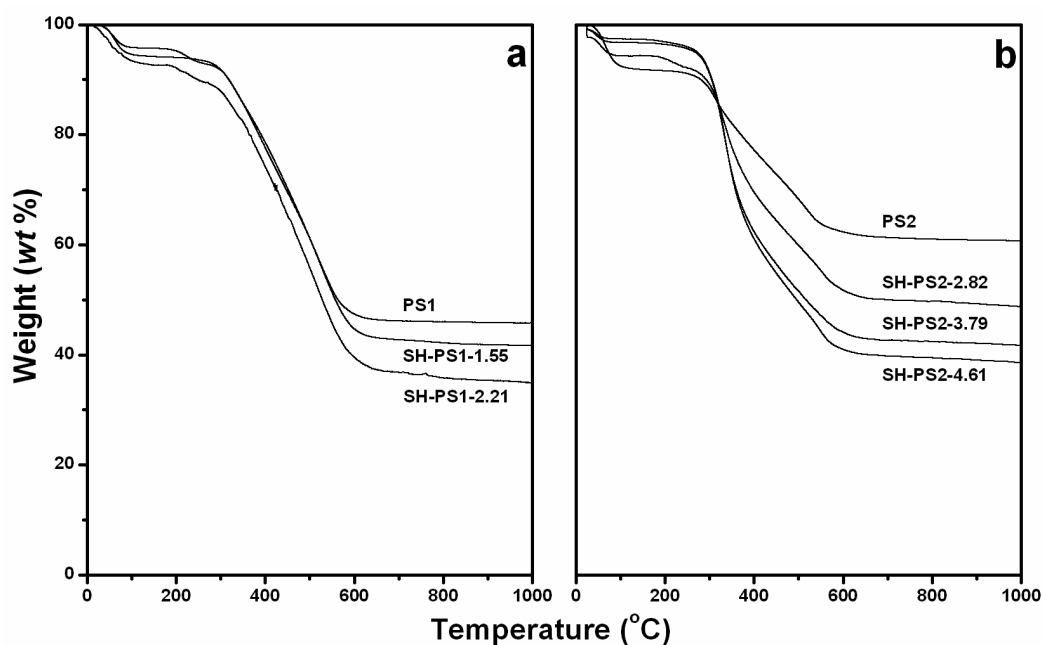

Fig. S4. *t*-plot analysis for mesoporous thiol-functionalized organic-inorganic hybrid materials SH-PS1-*x* with the silica/resins mass ratio of 1 and different thiol contents. *x* represents the thiol content estimated by the elemental analysis.

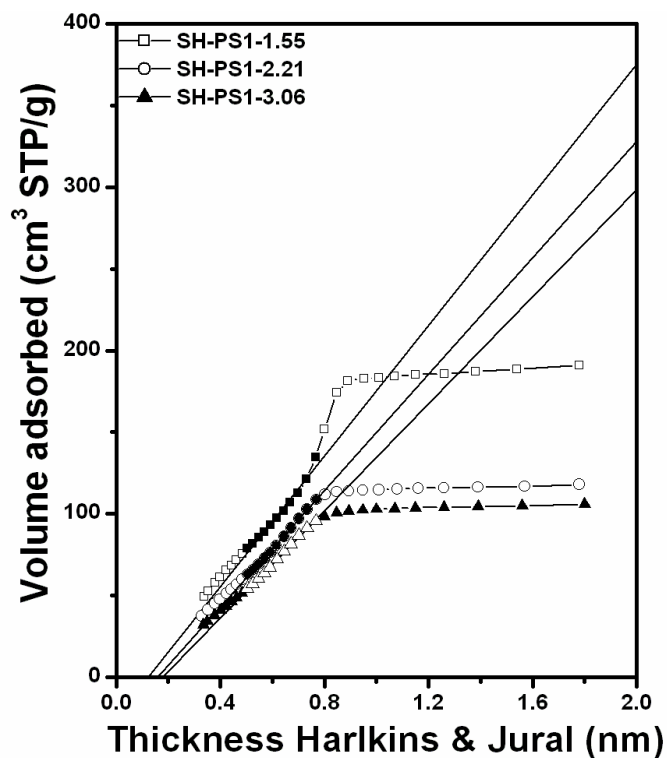

Fig. S5. NMR spectra for SH-PS2-*x* with the silica/resins mass ratio of 2 and different thiol contents.

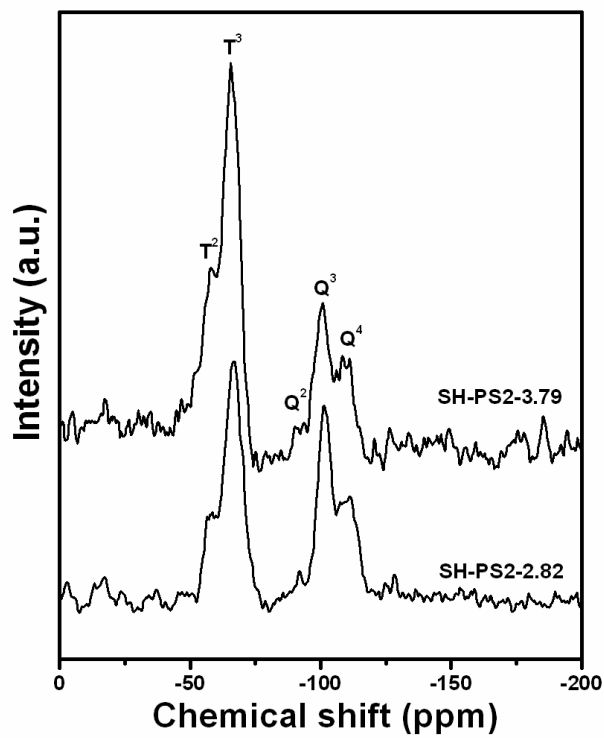



Fig. S6 (a) XRD patterns and (b) N<sub>2</sub> sorption isotherms for SH-PS2-3.79 after adsorption of Ag<sup>+</sup> (SH-PS2-3.79-adsorption) and desorption by 1.0 M HNO<sub>3</sub> acid (SH-PS2-3.79-desorption).

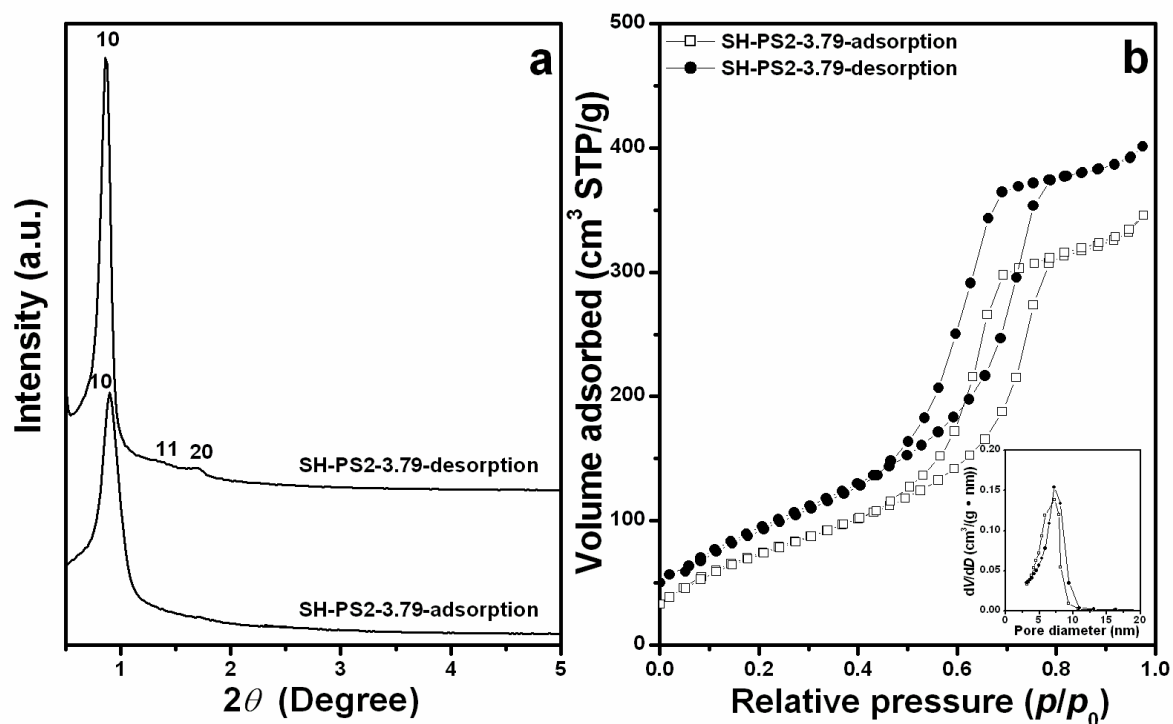

Supplement: c000063a.pdf [file c000063a.pdf]
